# Supplementary material for: Calcium Channel Blocker Use and the Risk for Breast Cancer: A Population-Based Nested Case-Control Study
Source: MDPI journal article supplement (doi:10.3390/cancers14092344), 2022-05-09
Supplement: s1 [file s1]

# Supplementary Materials: Calcium Channel Blocker Use and the Risk for Breast Cancer: A Population-Based Nested Case-Control Study

Victoria Rotshild, Bruria Hirsh Raccach, Muna Gazawe and Ilan Matok

**Table S1.** Antihypertensive Drugs categorized by Anatomical Therapeutic and Chemical Index [1].

| Antihypertensive drugs                           | ATC4 Code |
|--------------------------------------------------|-----------|
| $\alpha$ -blockers                               | C02CA     |
| Amiloride                                        | C03DB01   |
| Amiloride hydrochloride + Hydrochlorothiazide    | C03EA     |
| Angiotensin-converting enzyme inhibitors (ACEIs) | C09BB     |
| Angiotensin receptor blockers (ARBs)             | C09CA     |
| Beta-blockers (BBs)                              | C07       |
| Calcium Channel Blockers (CCB)                   | C08CA     |
| Clonidine                                        | C02AC     |
| Furosemide                                       | C03CA01   |
| Methyldopa                                       | C02AB     |
| Spironolactone                                   | C03DA01   |
| Thiazide diuretics                               | C03A      |

**Table S2.** Calcium Channel Blockers, categorized by Anatomical Therapeutic and Chemical Index [1].

| CCBs                 | ATC5 Code | DDD <sup>1</sup> |
|----------------------|-----------|------------------|
| Non-Dihydropyridines |           |                  |
| Diltiazem            | C08DB01   | 240 mg           |
| Verapamil            | C08DA01   | 240 mg           |
| Dihydropyridines     |           |                  |
| Amlodipine           | C08CA01   | 5 mg             |
| Felodipine           | C08CA02   | 5 mg             |
| Lercanidipine        | C08CA13   | 10 mg            |
| Nifedipine           | C08CA05   | 30 mg            |

<sup>1</sup> DDD: Defined Daily Dose (DDD) codes.

**Table S3.** Hormone Replacement Therapy categorized by Anatomical Therapeutic and Chemical Index [1].

| Hormone Replacement Therapy | ATC5 Code |
|-----------------------------|-----------|
| Conjugated Estrogens        | G03CA57   |
| Dienogest and Estrogen      | G03FA15   |
| Drospirenone and Estrogen   | G03FA17   |
| Estradiol                   | G03CA03   |
| Levonorgestrel and estrogen | G03FB09   |
| Norethisterone and Estrogen | G03FA01   |
| Norethisterone and Estrogen | G03FB05   |
| Tibolone                    | G03CX01   |

**Table S4.** Evaluation of potential confounders assessed by univariate conditional regression.

| Confounder                      | <i>p</i> -value | Odds Ratio | 95% CI |        |
|---------------------------------|-----------------|------------|--------|--------|
|                                 |                 |            | Lower  | Upper  |
| Hormone Replacement Therapy     | <0.001          | 1.232      | 1.102  | 1.377  |
| Comorbidity Score               | 0.272           | 0.987      | 0.965  | 1.010  |
| Smoking Status                  | 0.030           | 1.078      | 1.007  | 1.154  |
| Ethnicity                       |                 |            |        |        |
| Ethnicity- Arabic               | 0.788           | 1.318      | 0.177  | 9.843  |
| Ethnicity- Haredi Jewish        | 0.532           | 1.902      | 0.253  | 14.303 |
| Ethnicity –Other Jewish         | 0.422           | 2.276      | 0.305  | 16.966 |
| Body Mass Index (BMI)           |                 |            |        |        |
| BMI < 25                        | 0.163           | 1.339      | 0.889  | 2.018  |
| BMI 25–30                       | 0.128           | 1.371      | 0.914  | 2.057  |
| BMI > 30                        | 0.117           | 1.384      | 0.922  | 2.077  |
| Family history of Breast Cancer | <0.001          | 2.675      | 2.439  | 2.933  |
| Socioeconomic Status            |                 |            |        |        |
| Low Socioeconomic Status        | <0.001          | 1.335      | 1.245  | 1.431  |
| High Socioeconomic Status       | <0.001          | 1.521      | 1.400  | 1.652  |
